# Supplementary material
Source: PubMed Central journal article supplement (PMC3017218)
Supplement: NIHMS233026-supplement-01.pdf [file NIHMS233026-supplement-01.pdf]

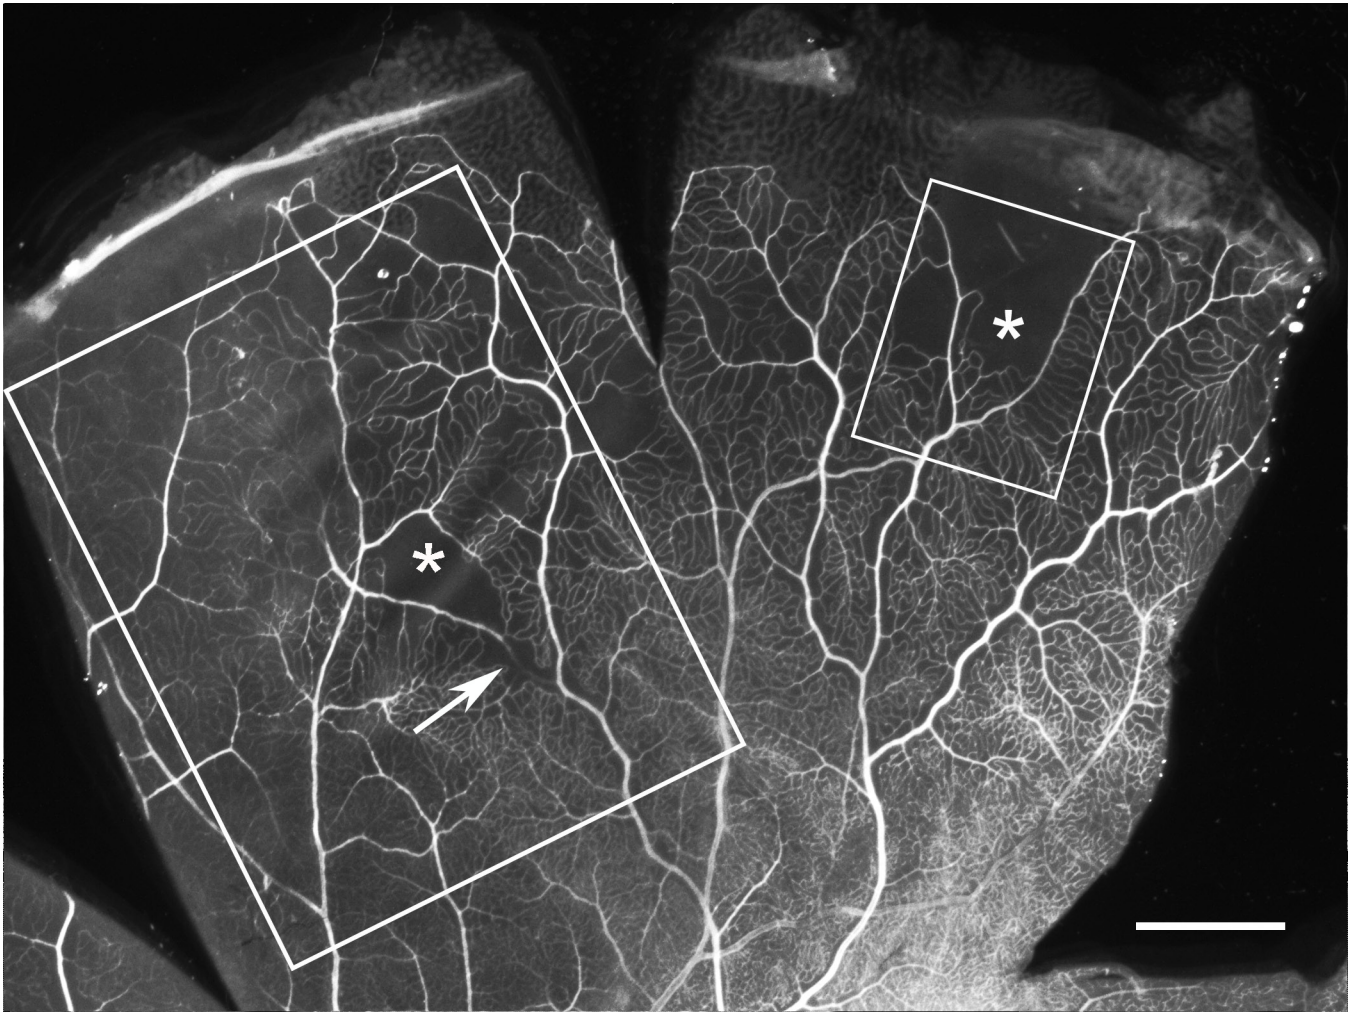

**Figure 1.** Adenosine diphosphatase (ADPase) labeled inferotemporal retina showing an arterial occlusion (arrow), arteriolar pruning, and areas of capillary dropout (asterisk). The outlined areas indicate the regions examined in cross section using light (large box) and electron microscopy (small box). Scale bar = 1mm
