# Supplementary material
Source: PubMed Central journal article supplement (PMC3017218)
Supplement: NIHMS233026-supplement-02.pdf [file NIHMS233026-supplement-02.pdf]

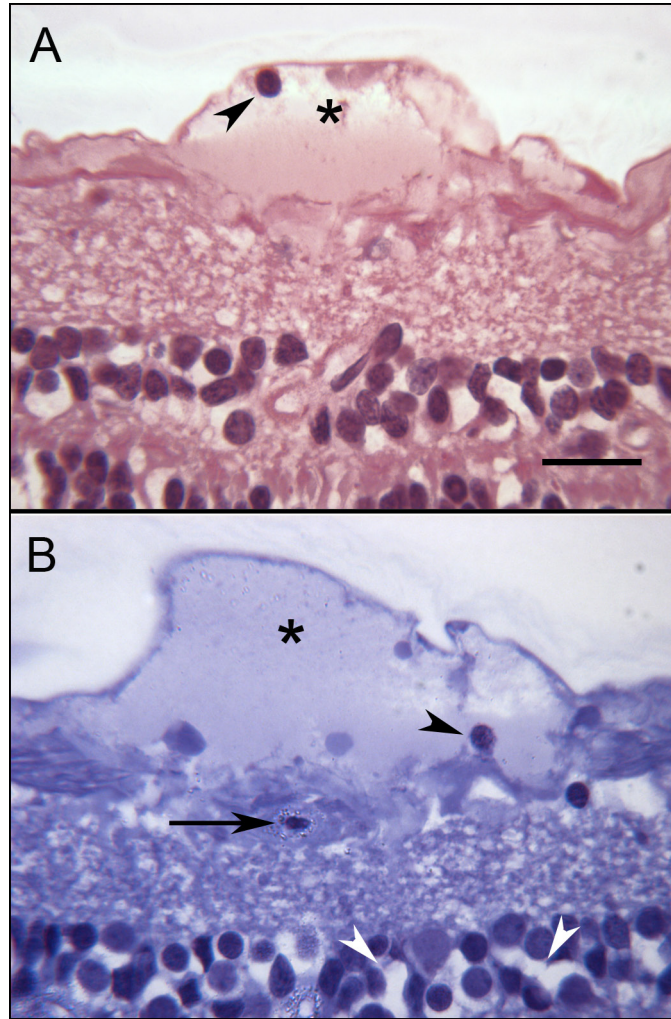

**Figure 3.** Sections showing serous-like exudate that extends along the internal limiting membrane creating a bleb-like structure (asterisks). In “B”, a degenerating capillary is shown (arrow). The spaces in the inner nuclear layer in “B” (white arrowheads) probably represent a postmortem artifact. Occasional inflammatory cells are found within the bleb (black arrowheads in A and B). Scale bar = 20 microns (A. toluidine blue/basic fuchsin; B. thionin)
